# Supplementary material for: A module-based analytical strategy to identify novel disease-associated genes shows an inhibitory role for interleukin 7 Receptor in allergic inflammation
Source: Springer Nature journal article supplement (doi:10.1186/1752-0509-3-19), 2009-02-12

# (1) Expression profiling

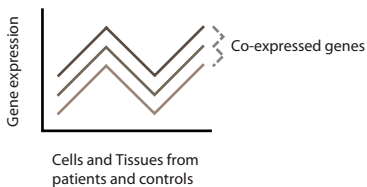

## (2 and 3) Identification of a pathway and a reference gene

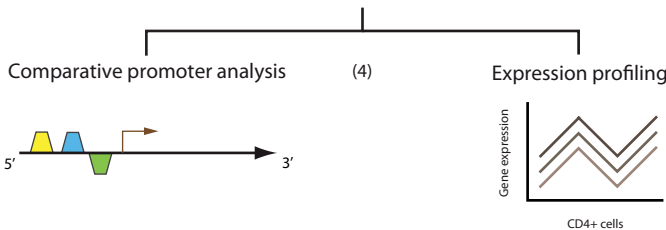

Transcription factor (GATA3)

## (5) Hypothetical module of GATA3 regulated genes

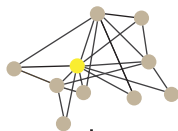

## (6) Expression profiling to validate the hypothetical module

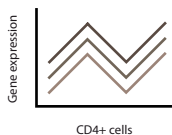

## (7) Topological analysis to find a novel gene (IL7R)

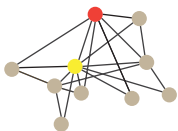

Supplement: 12918_2008_287_MOESM2_ESM.pdf [file 12918_2008_287_MOESM2_ESM.pdf]
