# Supplementary material for: A module-based analytical strategy to identify novel disease-associated genes shows an inhibitory role for interleukin 7 Receptor in allergic inflammation
Source: Springer Nature journal article supplement (doi:10.1186/1752-0509-3-19), 2009-02-12

**A**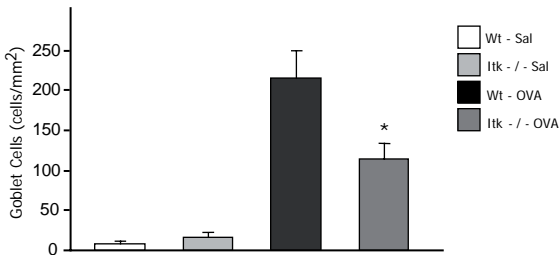**B**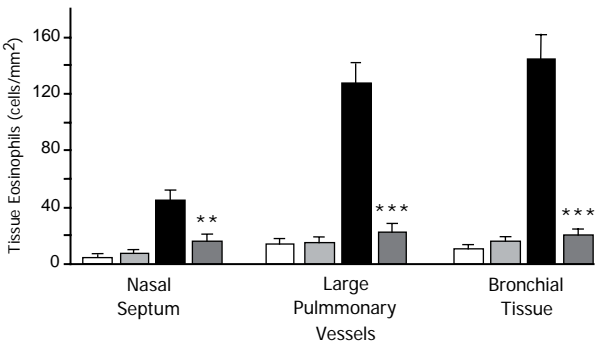

Supplement: 12918_2008_287_MOESM3_ESM.pdf [file 12918_2008_287_MOESM3_ESM.pdf]
